# Supplementary material
Source: PubMed Central journal article supplement (PMC3005821)
Supplement: NIHMS253239-supplement-1_si_001.pdf [file NIHMS253239-supplement-1_si_001.pdf]

Supporting Information for “Major Antiparallel and Minor Parallel  $\beta$  Sheet Populations Detected in the Membrane-Associated Human Immunodeficiency Virus Fusion Peptide” by S. Schmick and D. Weliky

| $(\Delta S/S_0)^{exp} + \sigma^{exp}$ in parentheses |              |              |              |              |
|------------------------------------------------------|--------------|--------------|--------------|--------------|
| Dephasing time (ms)                                  | HFP-NC       | HFP-P        | HFP-A        | HFP-AP       |
| 2.2                                                  | 0.019 (.013) | 0.027 (.013) | 0.012 (.023) | 0.017 (.028) |
| 8.2                                                  | 0.056 (.020) | 0.053 (.013) | 0.077 (.036) | 0.055 (.026) |
| 16.2                                                 | 0.071 (.020) | 0.061 (.015) | 0.107 (.021) | 0.128 (.022) |
| 24.2                                                 | 0.077 (.023) | 0.108 (.013) | 0.202 (.026) | 0.219 (.016) |
| 32.2                                                 | 0.086 (.017) | 0.087 (.018) | 0.244 (.025) | 0.265 (.020) |
| 40.2                                                 | 0.093 (.018) | 0.126 (.023) | 0.306 (.031) | 0.294 (.023) |
| 48.2                                                 | 0.089 (.028) | 0.162 (.025) | 0.325 (.060) | 0.344 (.020) |

Spin geometries and associated calculated  $\gamma_{1uv}^{lab}(\tau)$  for specific  $t$ ,  $u$ , and  $v$  in the fully constrained model or calculated  $\gamma_{1t_1t_2uv}^{lab}(\tau)$  for specific  $t_1$ ,  $t_2$ ,  $u$ , and  $v$  in the unconstrained model. In each spin geometry schematic, N or C respectively denote a labeled  $^{15}\text{N}$  nucleus or a labeled  $^{13}\text{CO}$  nucleus, and Y denotes either: (1) a  $^{13}\text{CO}$  HFP; (2) a X registry not detected by the labeling schemes of the HFP-P, HFP-A, or HFP-AP samples; or (3) any other registry with  $r_{CN} > 7 \text{ \AA}$  for the labeled  $^{13}\text{CO}$  and the labeled  $^{15}\text{Ns}$ . These latter  $r_{CN}$ s are not detected in the REDOR experiments. Each arrow denotes  $^{13}\text{CO}$ - $^{15}\text{N}$  dipolar coupling considered in the simulation. For unconstrained model geometries, the top/middle strand registry is at the top of the schematic and the middle/bottom strand registry is at the bottom of the schematic. When more than one spin geometries are shown, each  $\gamma(\tau)$  is the average for the displayed geometries.

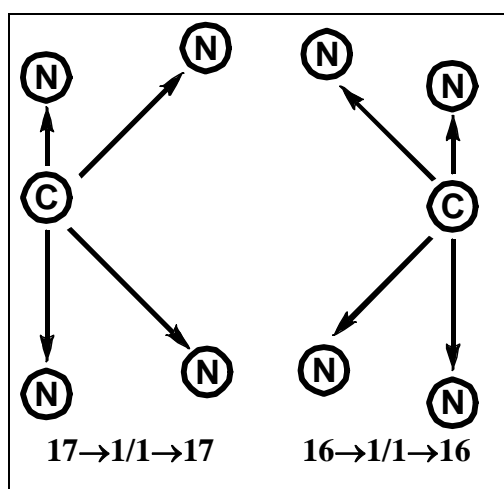

| $\tau$ (ms) | $\gamma_{1uv}^{lab}(\tau)$ | $t$ | $u$ | $v$ |
|-------------|----------------------------|-----|-----|-----|
| 2.2         | 0.9889                     | 2   | 2   | 4   |
| 8.2         | 0.8599                     | 2   | 3   | 4   |
| 16.2        | 0.5566                     |     |     |     |
| 24.2        | 0.2791                     |     |     |     |
| 32.2        | 0.1326                     |     |     |     |
| 40.2        | 0.0885                     |     |     |     |
| 48.2        | 0.0725                     |     |     |     |

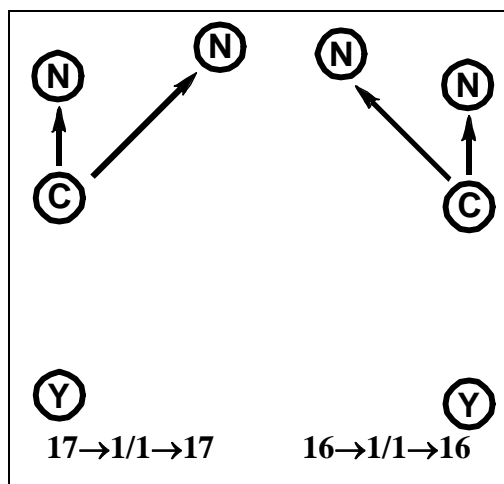

| $\tau$ (ms) | $\gamma_{1uv}^{lab}(\tau)$ | $t$ | $u$ | $v$ |
|-------------|----------------------------|-----|-----|-----|
| 2.2         | 0.9907                     | 2   | 2   | 2   |
| 8.2         | 0.8805                     | 2   | 3   | 2   |
| 16.2        | 0.5972                     |     |     |     |
| 24.2        | 0.2859                     |     |     |     |
| 32.2        | 0.0698                     |     |     |     |
| 40.2        | -0.0082                    |     |     |     |
| 48.2        | 0.0112                     |     |     |     |

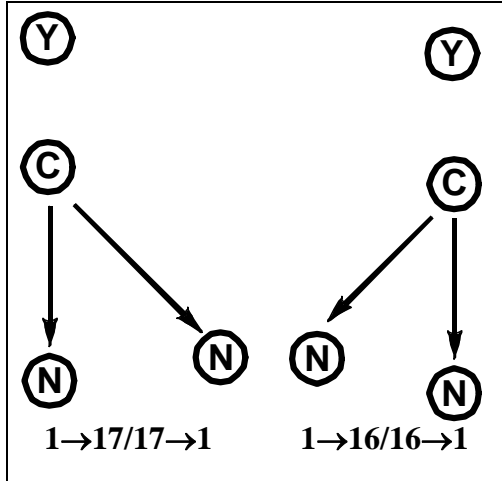

| $\tau$ (ms) | $\gamma_{1uv}^{lab}(\tau)$ | $t$ | $u$ | $v$ |
|-------------|----------------------------|-----|-----|-----|
| 2.2         | 0.9982                     | 2   | 2   | 3   |
| 8.2         | 0.9754                     | 2   | 3   | 3   |
| 16.2        | 0.9075                     |     |     |     |
| 24.2        | 0.8044                     |     |     |     |
| 32.2        | 0.6779                     |     |     |     |
| 40.2        | 0.5417                     |     |     |     |
| 48.2        | 0.4092                     |     |     |     |

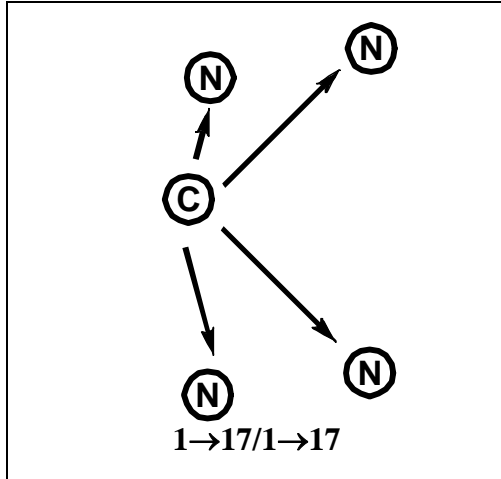

| $\tau$ (ms) | $\gamma_{tuv}^{lab}(\tau)$ | $t$ | $u$ | $v$ |
|-------------|----------------------------|-----|-----|-----|
| 2.2         | 0.9903                     | 1   | 1   | 4   |
| 8.2         | 0.8770                     | 1   | 3   | 4   |
| 16.2        | 0.6043                     |     |     |     |
| 24.2        | 0.3394                     |     |     |     |
| 32.2        | 0.1782                     |     |     |     |
| 40.2        | 0.1094                     |     |     |     |
| 48.2        | 0.0782                     |     |     |     |

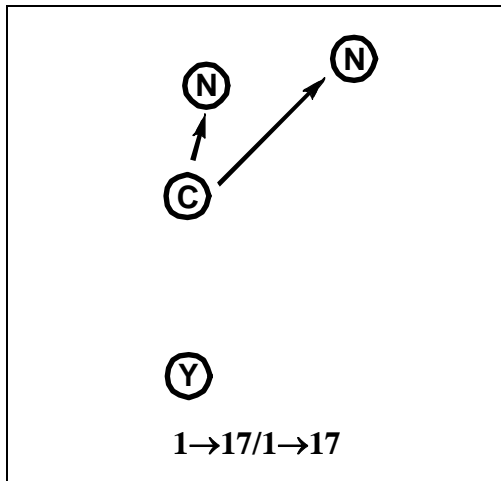

| $\tau$ (ms) | $\gamma_{tuv}^{lab}(\tau)$ | $t$ | $u$ | $v$ |
|-------------|----------------------------|-----|-----|-----|
| 2.2         | 0.9933                     | 1   | 1   | 2   |
| 8.2         | 0.9134                     | 1   | 3   | 2   |
| 16.2        | 0.6961                     |     |     |     |
| 24.2        | 0.4263                     |     |     |     |
| 32.2        | 0.1902                     |     |     |     |
| 40.2        | 0.0436                     |     |     |     |
| 48.2        | -0.0055                    |     |     |     |

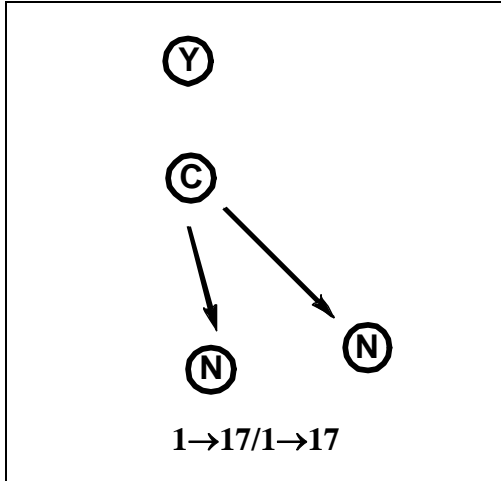

| $\tau$ (ms) | $\gamma_{tuv}^{lab}(\tau)$ | $t$ | $u$ | $v$ |
|-------------|----------------------------|-----|-----|-----|
| 2.2         | 0.9979                     | 1   | 1   | 3   |
| 8.2         | 0.9717                     | 1   | 3   | 3   |
| 16.2        | 0.8941                     |     |     |     |
| 24.2        | 0.7773                     |     |     |     |
| 32.2        | 0.6364                     |     |     |     |
| 40.2        | 0.4883                     |     |     |     |
| 48.2        | 0.3488                     |     |     |     |

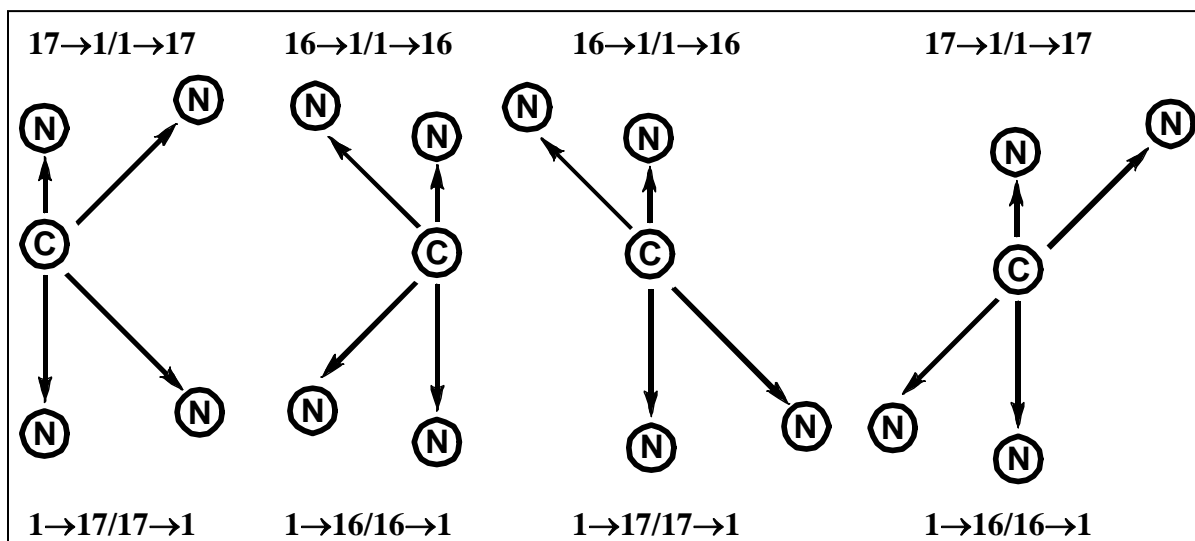

| $\tau$ (ms) | $\gamma_{1t_1 t_2 uv}^{lab}(\tau)$ | $t_1$ | $t_2$ | $u$ | $v$ |
|-------------|------------------------------------|-------|-------|-----|-----|
| 2.2         | 0.9889                             | 2     | 2     | 2   | 4   |
| 8.2         | 0.8605                             | 2     | 2     | 3   | 4   |
| 16.2        | 0.5582                             |       |       |     |     |
| 24.2        | 0.2806                             |       |       |     |     |
| 32.2        | 0.1318                             |       |       |     |     |
| 40.2        | 0.0847                             |       |       |     |     |
| 48.2        | 0.0681                             |       |       |     |     |

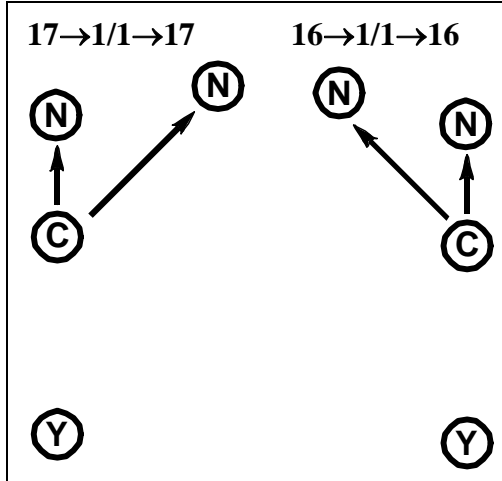

| $\tau$ (ms) | $\gamma_{1t_1t_2uv}^{lab}(\tau)$ | $t_1$ | $t_2$ | $u$ | $v$ |
|-------------|----------------------------------|-------|-------|-----|-----|
| 2.2         | 0.9907                           | 2     | 2     | 2   | 2   |
| 8.2         | 0.8805                           | 2     | 2     | 3   | 2   |
| 16.2        | 0.5972                           | 2     | 1     | 2   | 2   |
| 24.2        | 0.2859                           | 2     | 1     | 2   | 4   |
| 32.2        | 0.0698                           | 2     | 3     | 2   | 2   |
| 40.2        | -0.0082                          | 2     | 3     | 2   | 4   |
| 48.2        | 0.0112                           | 2     | 3     | 3   | 2   |
|             |                                  | 2     | 3     | 3   | 4   |

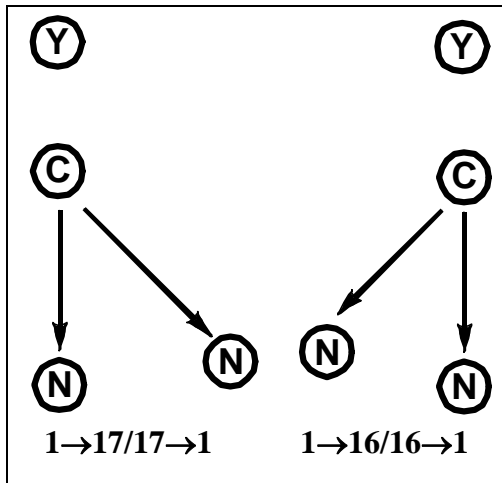

| $\tau$ (ms) | $\gamma_{1t_1t_2uv}^{lab}(\tau)$ | $t_1$ | $t_2$ | $u$ | $v$ |
|-------------|----------------------------------|-------|-------|-----|-----|
| 2.2         | 0.9982                           | 2     | 2     | 2   | 3   |
| 8.2         | 0.9754                           | 2     | 2     | 3   | 3   |
| 16.2        | 0.9075                           | 1     | 2     | 2   | 3   |
| 24.2        | 0.8044                           | 1     | 2     | 2   | 4   |
| 32.2        | 0.6779                           | 3     | 2     | 2   | 3   |
| 40.2        | 0.5417                           | 3     | 2     | 2   | 4   |
| 48.2        | 0.4092                           | 3     | 2     | 3   | 3   |
|             |                                  | 3     | 2     | 3   | 4   |

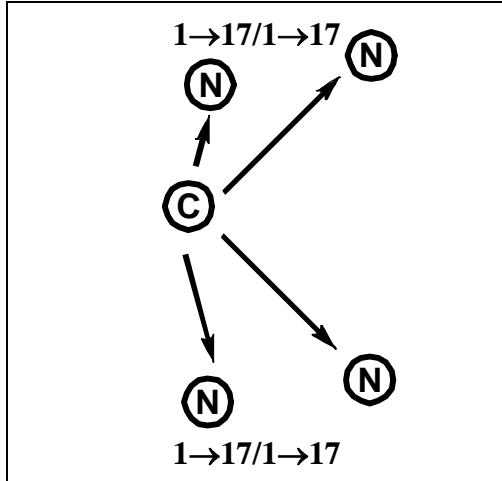

| $\tau$ (ms) | $\gamma_{1t_1t_2uv}^{lab}(\tau)$ | $t_1$ | $t_2$ | $u$ | $v$ |
|-------------|----------------------------------|-------|-------|-----|-----|
| 2.2         | 0.9903                           | 1     | 1     | 1   | 4   |
| 8.2         | 0.8770                           | 1     | 1     | 3   | 4   |
| 16.2        | 0.6043                           |       |       |     |     |
| 24.2        | 0.3394                           |       |       |     |     |
| 32.2        | 0.1782                           |       |       |     |     |
| 40.2        | 0.1094                           |       |       |     |     |
| 48.2        | 0.0782                           |       |       |     |     |



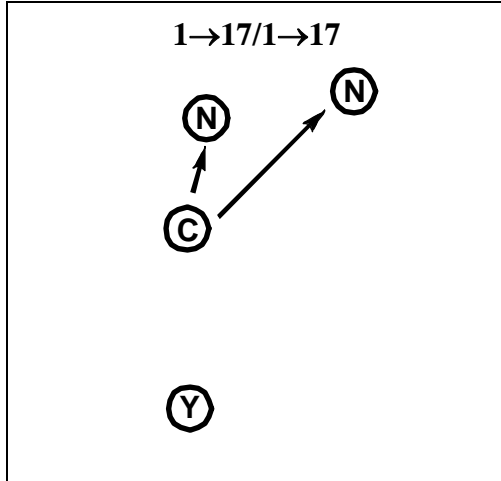

| $\tau$ (ms) | $\gamma_{1t_1t_2uv}^{lab}(\tau)$ | $t_1$ | $t_2$ | $u$ | $v$ |
|-------------|----------------------------------|-------|-------|-----|-----|
| 2.2         | 0.9933                           | 1     | 1     | 1   | 2   |
| 8.2         | 0.9134                           | 1     | 1     | 3   | 2   |
| 16.2        | 0.6961                           | 1     | 2     | 1   | 2   |
| 24.2        | 0.4263                           | 1     | 2     | 1   | 4   |
| 32.2        | 0.1902                           | 1     | 3     | 1   | 2   |
| 40.2        | 0.0436                           | 1     | 3     | 1   | 4   |
| 48.2        | -0.0055                          | 1     | 3     | 3   | 2   |
|             |                                  | 1     | 3     | 3   | 4   |

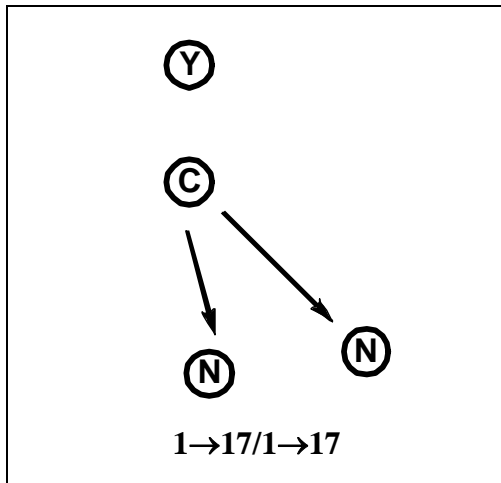

| $\tau$ (ms) | $\gamma_{1t_1t_2uv}^{lab}(\tau)$ | $t_1$ | $t_2$ | $u$ | $v$ |
|-------------|----------------------------------|-------|-------|-----|-----|
| 2.2         | 0.9979                           | 1     | 1     | 1   | 3   |
| 8.2         | 0.9717                           | 1     | 1     | 3   | 3   |
| 16.2        | 0.8941                           | 2     | 1     | 1   | 3   |
| 24.2        | 0.7773                           | 2     | 1     | 1   | 4   |
| 32.2        | 0.6364                           | 3     | 1     | 1   | 3   |
| 40.2        | 0.4883                           | 3     | 1     | 1   | 4   |
| 48.2        | 0.3488                           | 3     | 1     | 3   | 3   |
|             |                                  | 3     | 1     | 3   | 4   |

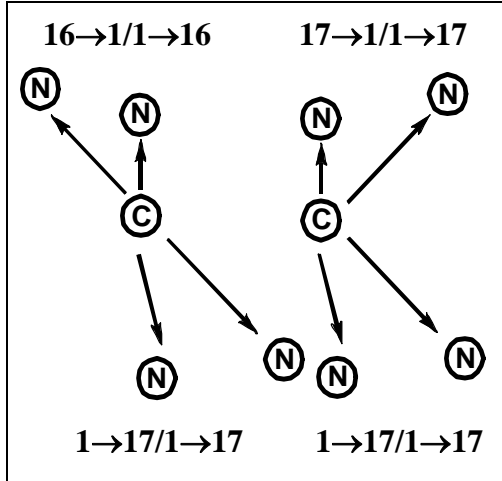

| $\tau$ (ms) | $\gamma_{1t_1t_2uv}^{lab}(\tau)$ | $t_1$ | $t_2$ | $u$ | $v$ |
|-------------|----------------------------------|-------|-------|-----|-----|
| 2.2         | 0.9903                           | 2     | 1     | 3   | 4   |
| 8.2         | 0.8766                           |       |       |     |     |
| 16.2        | 0.5998                           |       |       |     |     |
| 24.2        | 0.3263                           |       |       |     |     |
| 32.2        | 0.1591                           |       |       |     |     |
| 40.2        | 0.0937                           |       |       |     |     |
| 48.2        | 0.0712                           |       |       |     |     |

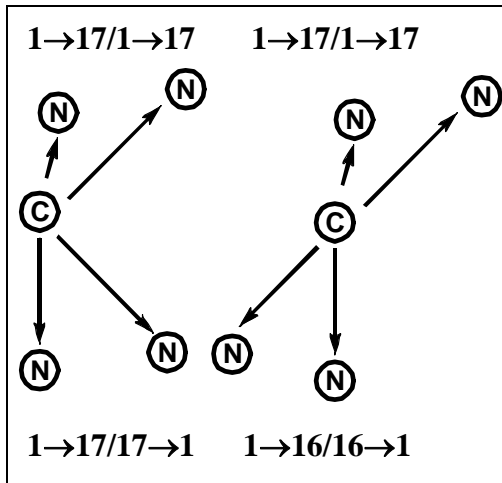

| $\tau$ (ms) | $\gamma_{1t_1t_2uv}^{lab}(\tau)$ | $t_1$ | $t_2$ | $u$ | $v$ |
|-------------|----------------------------------|-------|-------|-----|-----|
| 2.2         | 0.9904                           | 1     | 2     | 3   | 4   |
| 8.2         | 0.8782                           |       |       |     |     |
| 16.2        | 0.6061                           |       |       |     |     |
| 24.2        | 0.3389                           |       |       |     |     |
| 32.2        | 0.1753                           |       |       |     |     |
| 40.2        | 0.1079                           |       |       |     |     |
| 48.2        | 0.0805                           |       |       |     |     |
